# Supplementary material for: Derivation and external validation of a simple risk score for predicting severe acute kidney injury after intravenous cisplatin: cohort study
Source: PubMed Central journal article supplement — BMJ. 2024 Mar 27;384:e077169. doi: 10.1136/bmj-2023-077169 (PMC10964715; doi:10.1136/bmj-2023-077169), 2024-03-27
Supplement: gups077169.ww.pdf [file gups077169.ww.pdf]

## **Supplemental Appendix**

**Derivation and external validation of a simple risk score for predicting severe acute kidney injury after intravenous cisplatin: cohort study**

## Table of Contents

|                                                                                                                   |              |
|-------------------------------------------------------------------------------------------------------------------|--------------|
| <b>Supplemental Methods: Power Calculations</b> .....                                                             | 3            |
| <b>Supplemental Methods: Patient Survey</b> .....                                                                 | 4-5          |
| <b>Supplemental Tables</b> .....                                                                                  | <b>6-9</b>   |
| Table S1. ICD 9 and 10 Codes for Comorbidities.....                                                               | 6            |
| Table S2. Patient Characteristics by Outcome Status.....                                                          | 7            |
| Table S3. Equations for CP-AKI Models.....                                                                        | 8-9          |
| <b>Supplemental Figures</b> .....                                                                                 | <b>10-23</b> |
| Figure S1. Patient Survey Results.....                                                                            | 10           |
| Figure S2. Flow Diagram Depicting Study Population for the Derivation and Validation Cohorts, by Site.....        | 11           |
| Figure S3. Incidence of CP-AKI by Year. ....                                                                      | 12           |
| Figure S4. Partial Effect Plots for Restricted Cubic Splines.....                                                 | 13           |
| Figure S5. CP-AKI and Risk Score Characteristics.....                                                             | 14           |
| Figure S6. Incidence of CP-AKI According to Risk Score in Quartiles in the Derivation and Validation Cohorts..... | 15           |
| Figure S7. Model Calibration in the Validation Cohort.....                                                        | 16           |
| Figure S8. Decision Curves.....                                                                                   | 17           |
| Figure S9. Discrimination of Primary Model in Additional Analyses and Secondary Outcomes .....                    | 18           |
| Figure S10. C-Statistics for Secondary Outcomes.....                                                              | 19-20        |
| Figure S11. CP-AKI Severity and 1-Year Survival.....                                                              | 21           |
| Figure S12. MAKE365.....                                                                                          | 22           |
| Figure S13. Expert Recommendations for CP-AKI.....                                                                | 23           |
| <b>Supplemental References</b> .....                                                                              | <b>24</b>    |

## Supplemental Methods: Power Calculations

- 1) Sample size calculation for small optimism

$$S = \frac{0.1}{0.1 + 0.05 * 0.334} = 0.889$$

Assuming R<sup>2</sup> of approx. 0.134, expected optimism of 0.05, and max(R<sup>2</sup>) of 0.334,(1) then:

$$n = \frac{50}{(0.889 - 1) \ln \left( 1 - \frac{0.134}{0.889} \right)} \approx 2757$$

- 2) Sample size Calculation for model validation, and allowing for estimation of observed/expected (O/E) outcome ratio:

With outcome proportion in the validation set of 0.033, assuming O/E=1 and a target CI width of 0.5,(2)

$$n = \frac{1 - 0.033}{0.033 \times (0.128^2)} \approx 1789$$

## Supplemental Methods: Patient Survey

### Summary:

Cisplatin is a chemotherapy that is good at treating cancer, but can hurt the kidneys. We looked at information from more than 24,000 patients who were treated with cisplatin. We identified risk factors that make kidney problems from cisplatin more likely. These risk factors include things like older age, high blood pressure, diabetes, and receiving larger doses of cisplatin.

We created a simple score to categorize patients as being at low, medium, high, or very high risk of kidney problems from cisplatin. If you're in the very high risk group, you have more than a 17-times higher risk of developing kidney problems from cisplatin than if you're in the lowest risk group. We are happy to give you your "score."

Please note that you do not have to answer any questions you do not want to and your decision to participate will not affect your present or future care. We want to know what you think about the above findings. Please answer the questions below. Each question is graded on a scale from 1 to 5, with "1" indicating the least important or least useful, and "5" indicating the most important or most useful.

---

How important are these findings for the scientific community?

1    2    3    4    5

Not Important

Very Important

---

How important is it for patients with cancer to know about this information before getting cisplatin?

1    2    3    4    5

Not Important

Very Important

---

How much would you want your cancer doctor to use this information when discussing the risks and benefits of cisplatin with you?

1    2    3    4    5

Not at all

Very Much

---

How important is it to share these findings with patients with cancer?

1    2    3    4    5

Not Important

Very Important

---

Is giving out flyers and pamphlets at the doctor's office is a good way to share this information with patients?

1    2    3    4    5

Not at all

Very Much



**Table S1. ICD 9 and 10 Codes for Comorbidities**

| Comorbidity                           | ICD 9/10 Code                 | Description                                                                   | ICD 9 or 10 |
|---------------------------------------|-------------------------------|-------------------------------------------------------------------------------|-------------|
| Diabetes Mellitus                     | V12.21                        | History of gestational diabetes                                               | 9           |
|                                       | 249*                          | Secondary diabetes mellitus                                                   | 9           |
|                                       | 250*                          | Type 1 diabetes mellitus & Type 2 diabetes mellitus, uncontrolled             | 9           |
|                                       | 357.2                         | Neuropathy in diabetes                                                        | 9           |
|                                       | 362*                          | Diabetic retinopathy                                                          | 9           |
|                                       | 366.41                        | Diabetic cataracts                                                            | 9           |
|                                       | E08*                          | Diabetes due to underlying condition                                          | 10          |
|                                       | E09*                          | Drug or chemical induced diabetes                                             | 10          |
|                                       | E10*                          | Type 1 diabetes mellitus                                                      | 10          |
|                                       | E11*                          | Type 2 diabetes mellitus                                                      | 10          |
| E13*                                  | Other diabetes mellitus       | 10                                                                            |             |
| Hypertension                          | 401*                          | Essential hypertension                                                        | 9           |
|                                       | 402*                          | Hypertension with or without heart failure                                    | 9           |
|                                       | 403*                          | Hypertensive chronic kidney disease                                           | 9           |
|                                       | 404*                          | Hypertensive chronic kidney disease with or without heart failure             | 9           |
|                                       | 405*                          | Renovascular hypertension                                                     | 9           |
|                                       | 437.20                        | Hypertension encephalopathy                                                   | 9           |
|                                       | 642*                          | Hypertension complicating pregnancy                                           | 9           |
|                                       | I12.9                         | Kidney with heart disease (see hypertension, cardiorenal)                     | 10          |
|                                       | I13*                          | Cardiorenal (disease)                                                         | 10          |
|                                       | I15*                          | Renovascular                                                                  | 10          |
|                                       | I16*                          | Hypertensive crisis                                                           | 10          |
|                                       | I87*                          | Venous (chronic) idiopathic                                                   | 10          |
|                                       | I11.0                         | With heart failure (congestive)                                               | 10          |
|                                       | O13*                          | Gestational (without significant proteinuria) (pregnancy-induced) (transient) | 10          |
| O16*                                  | Complicating pregnancy        | 10                                                                            |             |
| R03.0                                 | Borderline                    | 10                                                                            |             |
| Congestive Heart Failure              | 398.91                        | Rheumatic heart failure                                                       | 9           |
|                                       | 402*                          | Hypertension with or without heart failure                                    | 9           |
|                                       | 404*                          | Hypertensive chronic kidney disease with or without heart failure             | 9           |
|                                       | 425.70                        | Metabolic cardiomyopathy                                                      | 9           |
|                                       | 428*                          | Congestive heart failure                                                      | 9           |
|                                       | 514.00                        | Pulmonary congestion/hypostasis                                               | 9           |
| I50*                                  | Congestive heart failure      | 10                                                                            |             |
| Chronic Obstructive Pulmonary Disease | 490.20                        | Bronchitis (chronic)                                                          | 9           |
|                                       | 491.21                        | Obstructive pulmonary disease with (acute) exacerbation                       | 9           |
|                                       | 493.2                         | Asthma (chronic) (obstructive)                                                | 9           |
|                                       | 496                           | Diffuse obstructive (chronic)                                                 | 9           |
| J44*                                  | Pulmonary chronic obstructive | 10                                                                            |             |
| Cirrhosis                             | 571*                          | Cirrhosis of liver                                                            | 9           |
|                                       | K70*                          | Alcoholic                                                                     | 10          |
| End-Stage Renal Disease (ESRD)        | 585*                          | Chronic end-stage renal disease                                               | 9           |
|                                       | N18.6                         | End-stage renal disease (ESRD)                                                | 10          |
|                                       | N28.9                         | Renal (functional) (pelvis) end-stage (failure)                               | 10          |
|                                       | I12.0                         | End-stage renal (ESRD) due to hypertension                                    | 10          |
| Smoking                               | V15.82                        | History of tobacco use                                                        | 9           |
|                                       | 305.1                         | Tobacco use disorder                                                          | 9           |
|                                       | 649*                          | Tobacco use in pregnancy                                                      | 9           |
|                                       | 989.84                        | Toxic effect of tobacco                                                       | 9           |
|                                       | O99*                          | Smoking (tobacco) complicating pregnancy                                      | 9           |
|                                       | Z77.22                        | Contact with and exposure to environmental tobacco smoke                      | 10          |
|                                       | Z71.6                         | (acute) (chronic)                                                             | 10          |
|                                       | Z72.0                         | Tobacco abuse counseling                                                      | 10          |
|                                       |                               | Tobacco abuse                                                                 | 10          |

\*Includes all codes with the preceding numeric identifiers

**Table S2. Baseline Characteristics by Outcome Status**

| Characteristic                                          | Derivation Cohort |                      | Validation Cohort |                      |
|---------------------------------------------------------|-------------------|----------------------|-------------------|----------------------|
|                                                         | AKI<br>(N=608)    | No AKI<br>(N=11,158) | AKI<br>(N=421)    | No AKI<br>(N=12,530) |
| <b>Demographics</b>                                     |                   |                      |                   |                      |
| Age (years) – median (IQR)                              | 63 (56-69)        | 59 (50-67)           | 62 (53-69)        | 60 (50-67)           |
| Male sex – no. (%)                                      | 362/608 (59.5)    | 6573/11,158 (58.9)   | 240/421 (57.0)    | 7100/12,530 (56.7)   |
| Race – no. (%)                                          |                   |                      |                   |                      |
| White                                                   | 508/608 (83.6)    | 8987/11,158 (80.5)   | 309/421 (73.4)    | 9574/12,530 (76.4)   |
| Black                                                   | 62/608 (10.2)     | 731/11,158 (6.6)     | 55/421 (13.1)     | 825/12,530 (6.6)     |
| Asian/Pacific Islander                                  | 16/608 (2.6)      | 787/11,158 (7.1)     | 12/421 (2.9)      | 634/12,530 (5.1)     |
| Other/Unknown                                           | 22/608 (3.6)      | 653/11,158 (5.9)     | 45/421 (10.7)     | 1497/12,530 (11.9)   |
| Ethnicity – no. (%)                                     |                   |                      |                   |                      |
| Non-Hispanic                                            | 505/608 (83.1)    | 9027/11,158 (80.9)   | 310/421 (73.6)    | 9755/12,530 (77.9)   |
| Hispanic                                                | 26/608 (4.3)      | 682/11,158 (6.1)     | 39/421 (9.3)      | 1298/12,530 (10.4)   |
| Body mass index – median (IQR)                          | 27.6 (24.3-31.6)  | 26.7 (23.5-30.4)     | 28.2 (24.6-32.8)  | 27.0 (23.5-30.8)     |
| <b>Coexisting conditions</b>                            |                   |                      |                   |                      |
| Diabetes mellitus – no. (%)                             | 103/608 (16.9)    | 1323/11,158 (11.9)   | 86/421 (20.4)     | 1747/12,530 (13.9)   |
| Hypertension – no. (%)                                  | 200/608 (32.9)    | 2700/11,158 (24.2)   | 192/421 (45.6)    | 4131/12,530 (33.0)   |
| Chronic obstructive pulmonary disease – no. (%)         | 101/608 (16.6)    | 1415/11,158 (12.7)   | 31/421 (7.4)      | 821/12,530 (6.6)     |
| Current or former smoker – no. (%)                      | 405/608 (66.6)    | 6357/11,158 (57.0)   | 138/421 (32.8)    | 3910/12,530 (31.2)   |
| Congestive heart failure – no. (%)                      | 7/608 (1.2)       | 84/11,158 (0.8)      | 19/421 (4.5)      | 352/12,530 (2.8)     |
| Cirrhosis – no. (%)                                     | 2/608 (0.3)       | 65/11,158 (0.6)      | 7/421 (1.7)       | 173/12,530 (1.4)     |
| Baseline eGFR (ml/min/1.73m <sup>2</sup> ) <sup>a</sup> |                   |                      |                   |                      |
| Median (IQR)                                            | 91 (76-101)       | 90 (75-101)          | 93 (77-107)       | 92 (77-103)          |
| ≥90 – no. (%)                                           | 316/608 (52.0)    | 5528/11,158 (49.5)   | 231/421 (54.9)    | 6781/12,530 (54.1)   |
| 60-89 – no. (%)                                         | 246/608 (40.5)    | 4662/11,158 (41.8)   | 148/421 (35.2)    | 4696/12,530 (37.5)   |
| 45-59 – no. (%)                                         | 36/608 (5.9)      | 829/11,158 (7.4)     | 34/421 (8.1)      | 864/12,530 (6.9)     |
| <45 – no. (%)                                           | 10/608 (1.6)      | 139/11,158 (1.2)     | 8/421 (1.9)       | 189/12,530 (1.5)     |
| <b>Laboratory Values</b>                                |                   |                      |                   |                      |
| WBC count – x10 <sup>9</sup> /L, median (IQR)           | 7.5 (5.8-9.9)     | 7.1 (5.6-9.1)        | 7.5 (5.8-10.3)    | 7.1 (5.6-9.2)        |
| Hemoglobin – g/L, median (IQR)                          | 126 (109-139)     | 128 (114-140)        | 119 (102-134)     | 127 (113-140)        |
| Platelet count – x10 <sup>9</sup> /L, median (IQR)      | 253 (200-333)     | 255 (204-321)        | 243 (185-322)     | 245 (197-306)        |
| Creatinine – μmol/L, median (IQR)                       | 70.7 (61.9-88.4)  | 79.6 (61.9-88.4)     | 69.8 (55.7-86.6)  | 72.5 (61.0-86.6)     |
| Magnesium – mmol/L, median (IQR)                        | 0.9 (0.8-0.9)     | 0.9 (0.8-0.9)        | 0.8 (0.7-0.9)     | 0.8 (0.8-0.9)        |
| Calcium – mmol/L, median (IQR)                          | 2.3 (2.2-2.4)     | 2.3 (2.2-2.4)        | 2.3 (2.1-2.4)     | 2.3 (2.2-2.4)        |
| Albumin – g/L, median (IQR)                             | 40 (35-43)        | 41 (37-44)           | 39 (33-42)        | 41 (37-43)           |
| <b>Chemotherapy</b>                                     |                   |                      |                   |                      |
| Cisplatin Dose (mg) – median (IQR)                      | 140 (80-190)      | 85 (60-160)          | 100 (64-160)      | 70 (46-94)           |
| Nephrotoxic chemotherapy – no. (%) <sup>b</sup>         | 65/608 (10.7)     | 1978/11,158 (8.8)    | 49/421 (11.6)     | 972/12,530 (7.8)     |
| Pemetrexed                                              | 45/608 (7.4)      | 628/11,158 (5.6)     | 12/421 (2.9)      | 250/12,530 (2.0)     |
| Immune checkpoint inhibitors                            | 13/608 (2.1)      | 126/11,158 (1.1)     | 11/421 (2.6)      | 175/12,530 (1.4)     |
| Cetuximab                                               | 0/608 (0.0)       | 0/11,158 (0.0)       | 1/421 (0.2)       | 45/12,530 (0.4)      |
| Ifosfamide                                              | 10/608 (1.6)      | 247/11,158 (2.2)     | 26/421 (6.2)      | 515/12,530 (4.1)     |

**Table Legend:**

<sup>a</sup>eGFR was calculated using the 2021 Chronic Kidney Disease Epidemiology Collaboration equation (3)

<sup>b</sup>Receipt of concomitant nephrotoxic chemotherapy was assessed within 30 days prior to cisplatin receipt, and included pemetrexed, immune checkpoint inhibitors (pembrolizumab, nivolumab, atezolizumab, durvalumab, avelumab, ipilimumab, and cemiplimab), cetuximab, and ifosfamide.

Missing data: In the overall cohort (n=24,717), ethnicity was missing in 3075 (12.4%), body mass index in 3889 (15.7%), smoking in 1,639 (6.6%), WBC count in 275 (1.1%), hemoglobin in 270 (1.1%), platelet count in 470 (1.9%), serum magnesium in 6577 (26.6%), serum calcium in 3356 (13.6%), serum albumin in 1938 (7.8%), cisplatin dose in 83 (0.3%), and immune checkpoint inhibitors in 5 (<0.1%).

Abbreviations: eGFR, estimated glomerular filtration rate; IQR, interquartile range; WBC, white blood cell.

**Table S3. Equations for CP-AKI Models**

| Model                       | Equation                                                                                                                                                                                                                                                                                                                                                                                                                                                                                                                                                                                                                                                                                                                                                                                                                                                                                                                                                                                                                                                                                                                                                                                                                                                                                                                                                                                                                                                                                                                                                                                     |
|-----------------------------|----------------------------------------------------------------------------------------------------------------------------------------------------------------------------------------------------------------------------------------------------------------------------------------------------------------------------------------------------------------------------------------------------------------------------------------------------------------------------------------------------------------------------------------------------------------------------------------------------------------------------------------------------------------------------------------------------------------------------------------------------------------------------------------------------------------------------------------------------------------------------------------------------------------------------------------------------------------------------------------------------------------------------------------------------------------------------------------------------------------------------------------------------------------------------------------------------------------------------------------------------------------------------------------------------------------------------------------------------------------------------------------------------------------------------------------------------------------------------------------------------------------------------------------------------------------------------------------------|
| <b>Primary Model</b>        | $(-3.686659 + \{0.04421425Age + 0.0000183485(Age - 30)\}_+^3 - 0.0002163227(Age - 51)\}_+^3 + 0.0004394909(Age - 59)\}_+^3 - 0.0002907307(Age - 66)\}_+^3 + 0.0000492141(Age - 76)\}_+^3) - \{0.2525115Mg - 5.801969(Mg - 1.7)\}_+^3 + 29.89521(Mg - 1.9456)\}_+^3 - 43.75054(Mg - 2.1)\}_+^3 + 18.23788(Mg - 2.2)\}_+^3 + 1.419414(Mg - 2.432)\}_+^3) - \{0.04471118Hgb - 0.009984642(Hgb - 9.1)\}_+^3 + 0.07499566(Hgb - 11.6)\}_+^3 - 0.1355953(Hgb - 12.8)\}_+^3 + 0.08595369(Hgb - 13.9)\}_+^3 - 0.01536942(Hgb - 15.5)\}_+^3) + \{0.01993736WBC - 0.003237126(WBC - 3.8)\}_+^3 + 0.02176998(WBC - 5.8)\}_+^3 - 0.03178413(WBC - 7.1)\}_+^3 + 0.01411246(WBC - 8.8)\}_+^3 - 0.0008611787(WBC - 14.5)\}_+^3) - \{0.4990617Alb - 0.02681548(Alb - 3)\}_+^3 + 4.312953(Alb - 3.8)\}_+^3 - 13.50495(Alb - 4.1)\}_+^3 + 10.66724(Alb - 4.3)\}_+^3 - 1.448432(Alb - 4.7)\}_+^3) + \{0.04708185Cisplatin - 0.00001028397(Cisplatin - 38)\}_+^3 + 0.00002391644(Cisplatin - 65)\}_+^3 - 0.00001521614(Cisplatin - 90)\}_+^3 + 0.000002039042(Cisplatin - 150)\}_+^3 - 0.0000004553695(Cisplatin - 220)\}_+^3) + \{0.00397566Plt - 0.0000005145004(Plt - 137)\}_+^3 + 0.00000222745(Plt - 210)\}_+^3 - 0.000002459005(Plt - 255)\}_+^3 + 0.0000007631055(Plt - 312)\}_+^3 - 0.00000001705063(Plt - 488)\}_+^3) - \{4.626802BaselineSCr + 94.00696(BaselineSCr - 0.6)\}_+^3 - 187.9561(BaselineSCr - 0.7)\}_+^3 + 232.7567(BaselineSCr - 0.9)\}_+^3 - 153.7796(BaselineSCr - 1.0)\}_+^3 + 14.97206(BaselineSCr - 1.3)\}_+^3) + 0.2739952Htn + 0.2528551Diabetes) $                                |
| <b>Secondary Outcome #1</b> | $(-2.490598 + \{0.04000223Age + 0.00000006298178(Age - 30)\}_+^3 - 0.00002418857(Age - 51)\}_+^3 + 0.00005872481(Age - 59)\}_+^3 - 0.00003965045(Age - 66)\}_+^3 + 0.000005051239(Age - 76)\}_+^3) + \{0.06689548Mg - 1.359371(Mg - 1.7)\}_+^3 - 4.58897(Mg - 1.9456)\}_+^3 + 34.63995(Mg - 2.1)\}_+^3 - 35.6609(Mg - 2.2)\}_+^3 + 6.969292(Mg - 2.432)\}_+^3) - \{0.03856351Hgb - 0.005212778(Hgb - 9.1)\}_+^3 + 0.07172748(Hgb - 11.6)\}_+^3 - 0.1880601(Hgb - 12.8)\}_+^3 + 0.1633668(Hgb - 13.9)\}_+^3 - 0.0418214(Hgb - 15.5)\}_+^3) + \{0.07928039WBC - 0.01212509(WBC - 3.8)\}_+^3 + 0.05110061(WBC - 5.8)\}_+^3 - 0.05636264(WBC - 7.1)\}_+^3 + 0.01793802(WBC - 8.8)\}_+^3 - 0.0005508973(WBC - 14.5)\}_+^3) - \{0.613374Alb + 0.3375341(Alb - 3)\}_+^3 - 2.411267(Alb - 3.8)\}_+^3 + 3.335702(Alb - 4.1)\}_+^3 - 1.012722(Alb - 4.3)\}_+^3 - 0.2492469(Alb - 4.7)\}_+^3) + \{0.0353438Cisplatin - 0.000006688326(Cisplatin - 38)\}_+^3 + 0.0000158907(Cisplatin - 65)\}_+^3 - 0.00001065217(Cisplatin - 90)\}_+^3 + 0.000001985695(Cisplatin - 150)\}_+^3 - 0.0000005359009(Cisplatin - 220)\}_+^3) - \{0.03891557BMI + 0.001334993(BMI - 19.55852)\}_+^3 - 0.005182263(BMI - 23.85243)\}_+^3 + 0.005650217(BMI - 26.7063)\}_+^3 - 0.001884502(BMI - 29.97543)\}_+^3 + 0.00008155498(BMI - 37.90634)\}_+^3) - \{1.034175BaselineSCr - 22.52534(BaselineSCr - 0.6)\}_+^3 + 54.79238(BaselineSCr - 0.7)\}_+^3 - 76.86693(BaselineSCr - 0.9)\}_+^3 + 45.4636(BaselineSCr - 1.0)\}_+^3 - 0.8637109(BaselineSCr - 1.3)\}_+^3) + 0.2538455Htn + 0.1266644Diabetes + 0.09053564Smoking) $ |
| <b>Secondary Outcome #2</b> | $(-4.153904 + \{0.02410884Age + 0.000005252085(Age - 30)\}_+^3 - 0.0006015845(Age - 51)\}_+^3 + 0.001132983(Age - 59)\}_+^3 - 0.0006637052(Age - 66)\}_+^3 + 0.00007978621(Age - 76)\}_+^3) + \{0.05743622Mg - 15.30692(Mg - 1.7)\}_+^3 + 75.33083(Mg - 1.9456)\}_+^3 - 109.4739(Mg - 2.1)\}_+^3 + 47.02194(Mg - 2.2)\}_+^3 + 2.428062(Mg - 2.432)\}_+^3) - \{0.4181957Hgb + 0.0123466(Hgb - 9.1)\}_+^3 - 0.06520753(Hgb - 11.6)\}_+^3 + 0.09086393(Hgb - 12.8)\}_+^3 - 0.04377594(Hgb - 13.9)\}_+^3 + 0.00577293(Hgb - 15.5)\}_+^3) + \{0.1589295WBC - 0.02967569(WBC - 3.8)\}_+^3 + 0.1497068(WBC - 5.8)\}_+^3 - 0.1889221(WBC - 7.1)\}_+^3 + 0.07247453(WBC - 8.8)\}_+^3 - 0.003583471(WBC - 14.5)\}_+^3) + \{0.02870776Cisplatin - 0.000002161638(Cisplatin - 38)\}_+^3 + 0.000003402058(Cisplatin - 65)\}_+^3 - 0.0000009506496(Cisplatin - 90)\}_+^3 - 0.0000001473776(Cisplatin - 150)\}_+^3 - 0.0000001423929(Cisplatin - 220)\}_+^3) + \{0.005083972Plt - 0.0000007825818(Plt - 137)\}_+^3 + 0.000003303735(Plt - 210)\}_+^3 - 0.000003514574(Plt - 255)\}_+^3 + 0.0000009951348(Plt - 312)\}_+^3 - 0.000000001713566(Plt - 488)\}_+^3) - \{1.883519BaselineSCr + 39.80574(BaselineSCr - 0.6)\}_+^3 - 90.60196(BaselineSCr - 0.7)\}_+^3 + 152.0967(BaselineSCr - 0.9)\}_+^3 - 114.4718(BaselineSCr - 1.0)\}_+^3 + 13.17128(BaselineSCr - 1.3)\}_+^3) + 0.3425585Htn) $                                                                                                                                                                                                              |
| <b>Secondary Outcome #3</b> | $(7.557475 + \{0.01868734Age - 0.0000003677806(Age - 30)\}_+^3 - 0.00007915008(Age - 51)\}_+^3 + 0.0002756448(Age - 59)\}_+^3 - 0.0002690292(Age - 66)\}_+^3 + 0.00007290223(Age - 76)\}_+^3) - \{0.6482215Mg + 1.194161(Mg - 1.7)\}_+^3 + 1.281955(Mg - 1.9456)\}_+^3 - 7.189057(Mg - 2.1)\}_+^3 + 3.832321(Mg - 2.2)\}_+^3 + 0.8806202(Mg - 2.432)\}_+^3) - \{0.1256361Hgb - 0.00345172(Hgb - 9.1)\}_+^3 - 0.004177308(Hgb - 11.6)\}_+^3 + 0.05755815(Hgb - 12.8)\}_+^3 - 0.07314031(Hgb - 13.9)\}_+^3 + 0.02321119(Hgb - 15.5)\}_+^3) + \{0.2446413WBC - 0.02500308(WBC - 3.8)\}_+^3 + 0.119387(WBC - 5.8)\}_+^3 - 0.1472926(WBC - 7.1)\}_+^3 + 0.05593524(WBC - 8.8)\}_+^3 - 0.003026611(WBC - 14.5)\}_+^3) - \{0.83535Alb - 0.1959481(Alb - 3)\}_+^3 - 1.746562(Alb - 3.8)\}_+^3 + 14.64228(Alb - 4.1)\}_+^3 - 17.20088(Alb - 4.3)\}_+^3 + 4.501108(Alb - 4.7)\}_+^3) $                                                                                                                                                                                                                                                                                                                                                                                                                                                                                                                                                                                                                                                                                                                 |



---


$$\begin{aligned}
& - \{0.01668694 \text{Cisplatin} + 0.00000428506(\text{Cisplatin} - 38)_+^3 - 0.000008179878(\text{Cisplatin} - 65)_+^3 + \\
& 0.000003476913(\text{Cisplatin} - 90)_+^3 + 0.0000005143064(\text{Cisplatin} - 150)_+^3 - \\
& 0.00000009640148(\text{Cisplatin} - 220)_+^3\} \\
& - \{0.09689629\text{BMI} + 0.001743043(\text{BMI} - 19.55852)_+^3 - 0.005918177(\text{BMI} - 23.85243)_+^3 + \\
& 0.005785523(\text{BMI} - 26.7063)_+^3 - 0.001715514(\text{BMI} - 29.97543)_+^3 + 0.000105126(\text{BMI} - 37.90634)_+^3\} \\
& - \{0.00575309\text{Plt} + 0.00000001980788(\text{Plt} - 137)_+^3 + 0.0000003956919(\text{Plt} - 210)_+^3 - \\
& 0.0000008248991(\text{Plt} - 255)_+^3 + 0.0000004275374(\text{Plt} - 312)_+^3 - 0.00000001813806(\text{Plt} - 488)_+^3\} \\
& - \{2.71515\text{BaselineSCr} + 14.59871(\text{BaselineSCr} - 0.6)_+^3 - 21.01498(\text{BaselineSCr} - 0.7)_+^3 + \\
& 17.96645(\text{BaselineSCr} - 0.9)_+^3 - 15.98897(\text{BaselineSCr} - 1.0)_+^3 + 4.438785(\text{BaselineSCr} - 1.3)_+^3\} \\
& + 0.1552521\text{Htn}
\end{aligned}$$


---

**Secondary Outcome #1** is defined according to modified KDIGO AKI staging as any of the following occurring in the first 14 days following IV cisplatin: absolute increase in SCr of  $\geq 26.5 \mu\text{mol/L}$  mg/dl compared to baseline, relative increase in SCr  $\geq 1.5$ -fold compared to baseline, or receipt of KRT.

**Secondary Outcome #2** is severe CP-AKI, defined as  $\geq 3$ -fold rise in SCr or receipt of KRT within 14 days following IV cisplatin.

**Secondary Outcome #3** is MAKE90, defined as death within 90 days, KRT within 90 days, or persistent kidney dysfunction (increase in SCr  $\geq 100\%$  compared to baseline) at day 90 post-cisplatin.

Abbreviations: Alb, albumin; BMI, body mass index; CP-AKI, cisplatin-associated acute kidney injury; eGFR, estimated glomerular filtration rate; Hgb, hemoglobin; Htn, hypertension; KDIGO, Kidney Disease Improving Global Outcomes; KRT, kidney replacement therapy; MAKE, major adverse kidney event; Mg, magnesium; Plt, platelets; SCr, serum creatinine; WBC, white blood cell.

**Figure S1. Patient Survey Results**

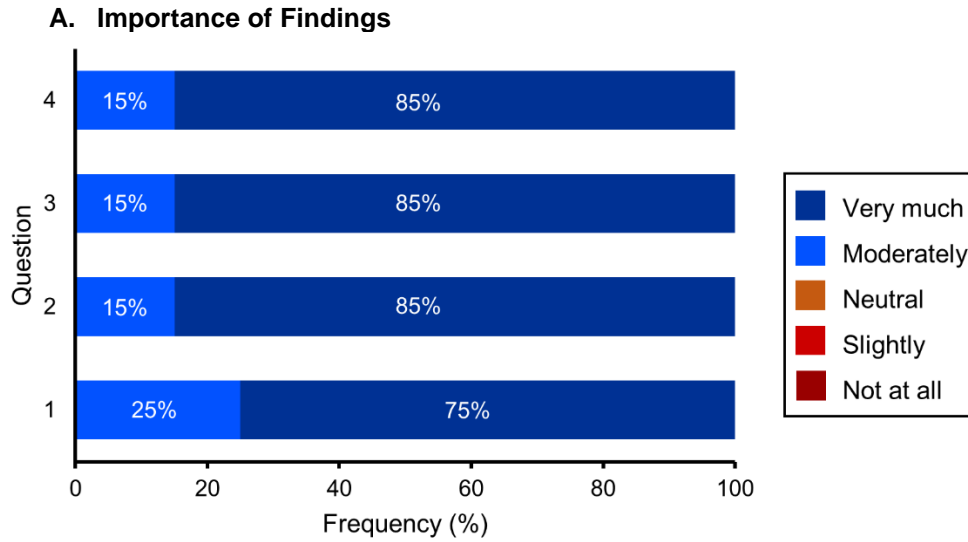

- Q1: How important are these findings for the scientific community?  
 Q2: How important is it for patients with cancer to know about this information before getting cisplatin?  
 Q3: How much would you want your cancer doctor to use this information when discussing the risks and benefits of cisplatin with you?  
 Q4: How important is it to share these findings with patients with cancer?

**B. Modes of Dissemination of Information**

Most Favorable to Least Favorable:

1. Cancer Societies, Q7 (Average = 3.9, Median = 4)
2. Patient Advocacy and Support Groups, Q6 (Average = 3.4, Median = 3) (Tie)
3. Social Media, Q8 (Average = 3.4, Median = 3) (Tie)
4. Flyers and Pamphlets at the Doctor's Office, Q5 (Average = 3.2, Median = 3)

5=very much; 4=moderately; 3=neutral; 2=slightly; 1=not at all

**Figure S2. Flow Diagram Depicting Study Population for the Derivation and Validation Cohorts, by Site**

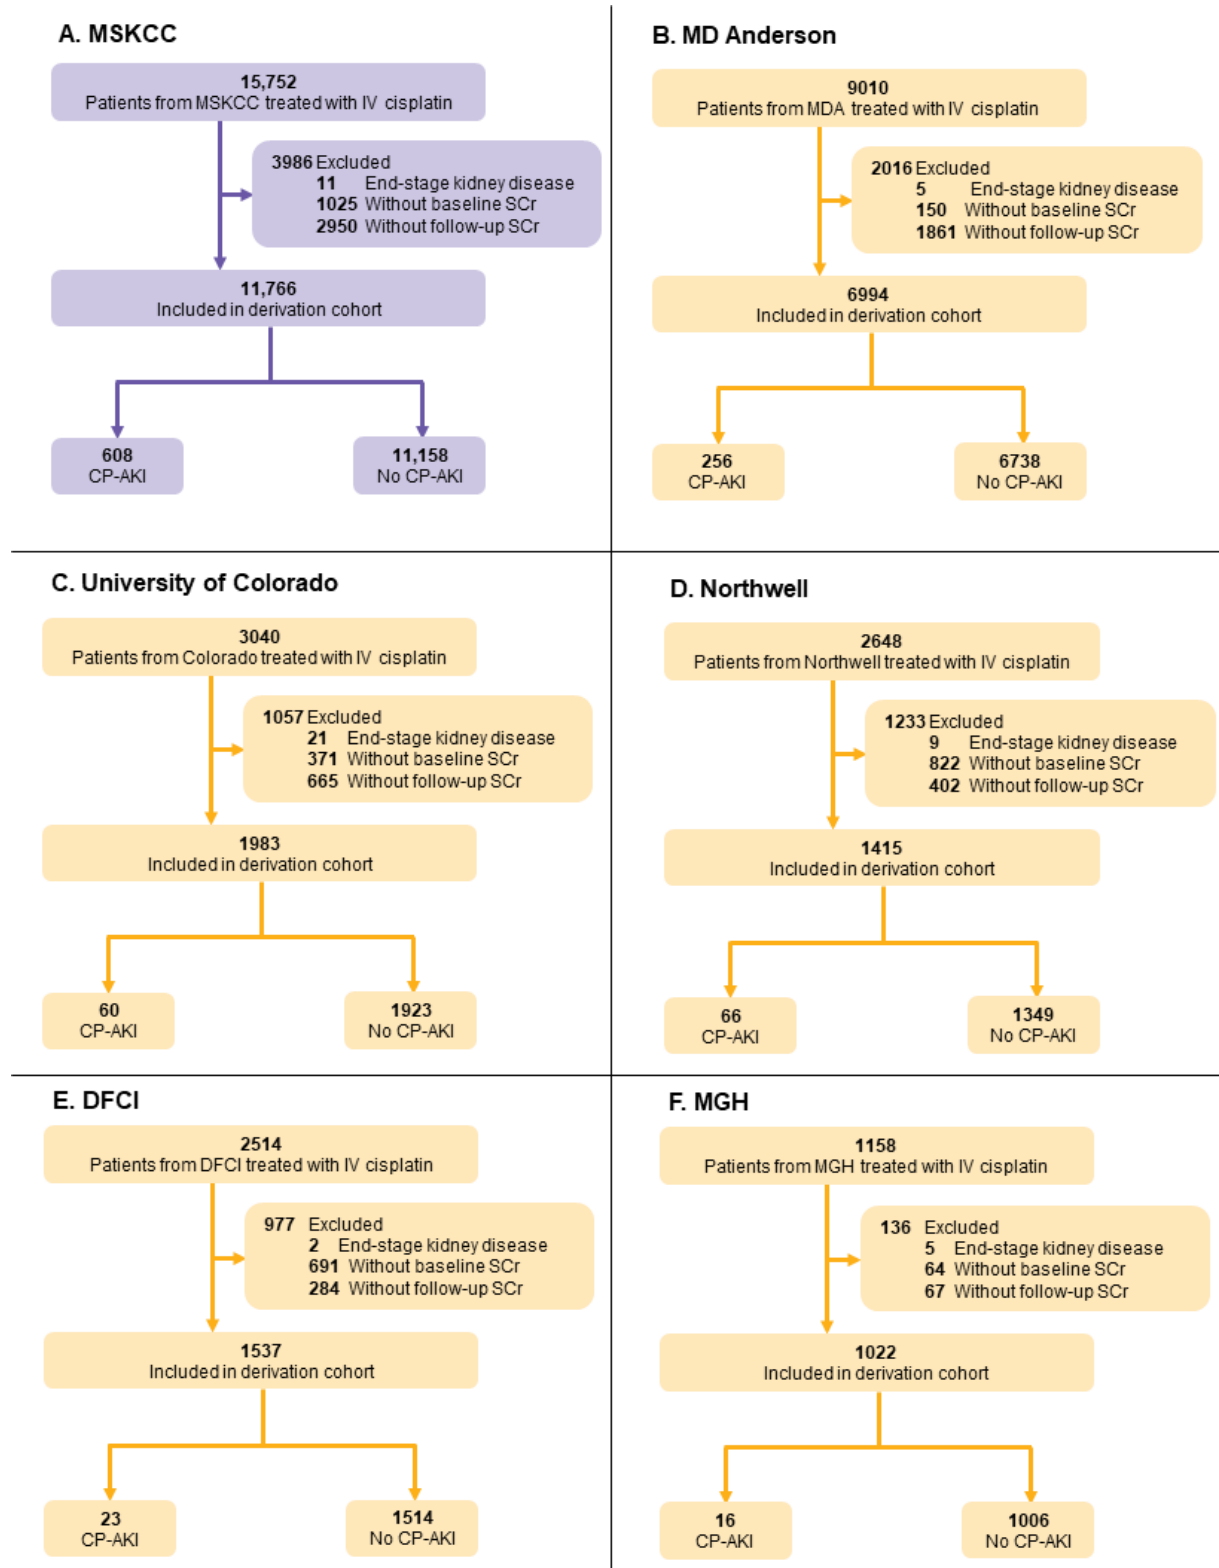

Abbreviations: CP-AKI, cisplatin-associated acute kidney injury; DFCI, Dana-Farber Cancer Institute; MGH, Massachusetts General Hospital; MSKCC, Memorial Sloan Kettering Cancer Center; SCr, serum creatinine.

**Figure S3. Incidence of CP-AKI by Year**

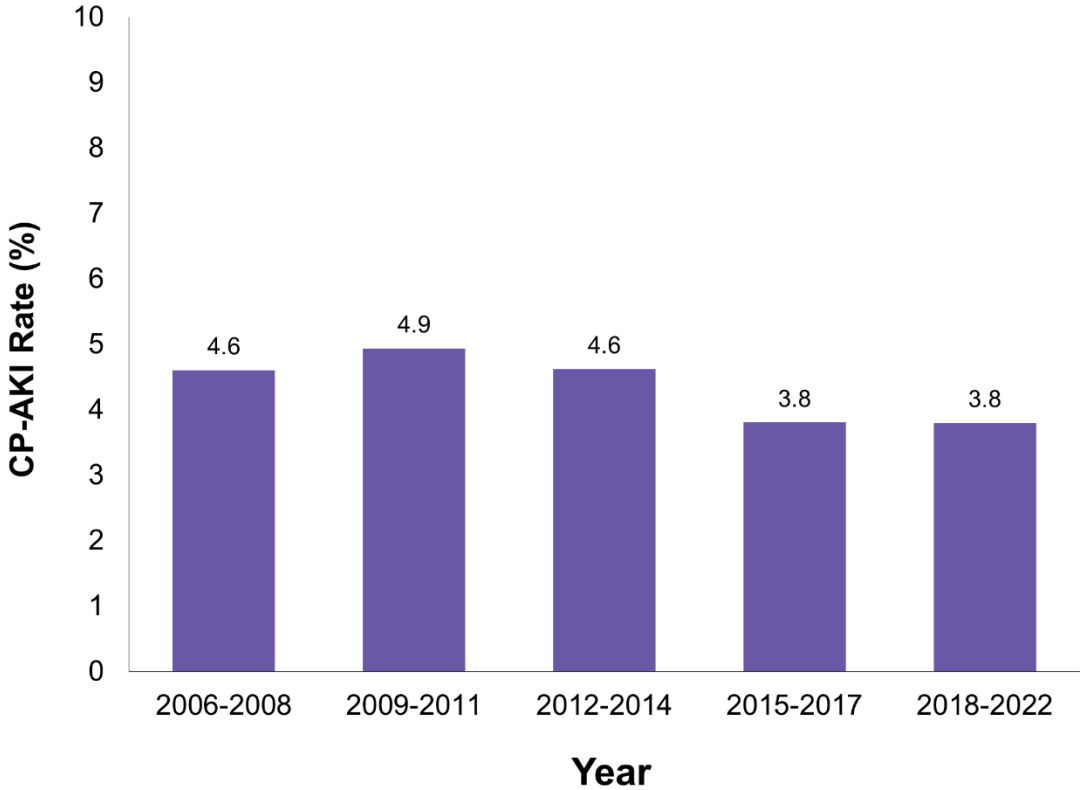

Data are shown for the overall cohort (n=24,717)  
Abbreviations: CP-AKI, cisplatin-associated acute kidney injury.

**Figure S4. Partial Effect Plots for Restricted Cubic Splines**

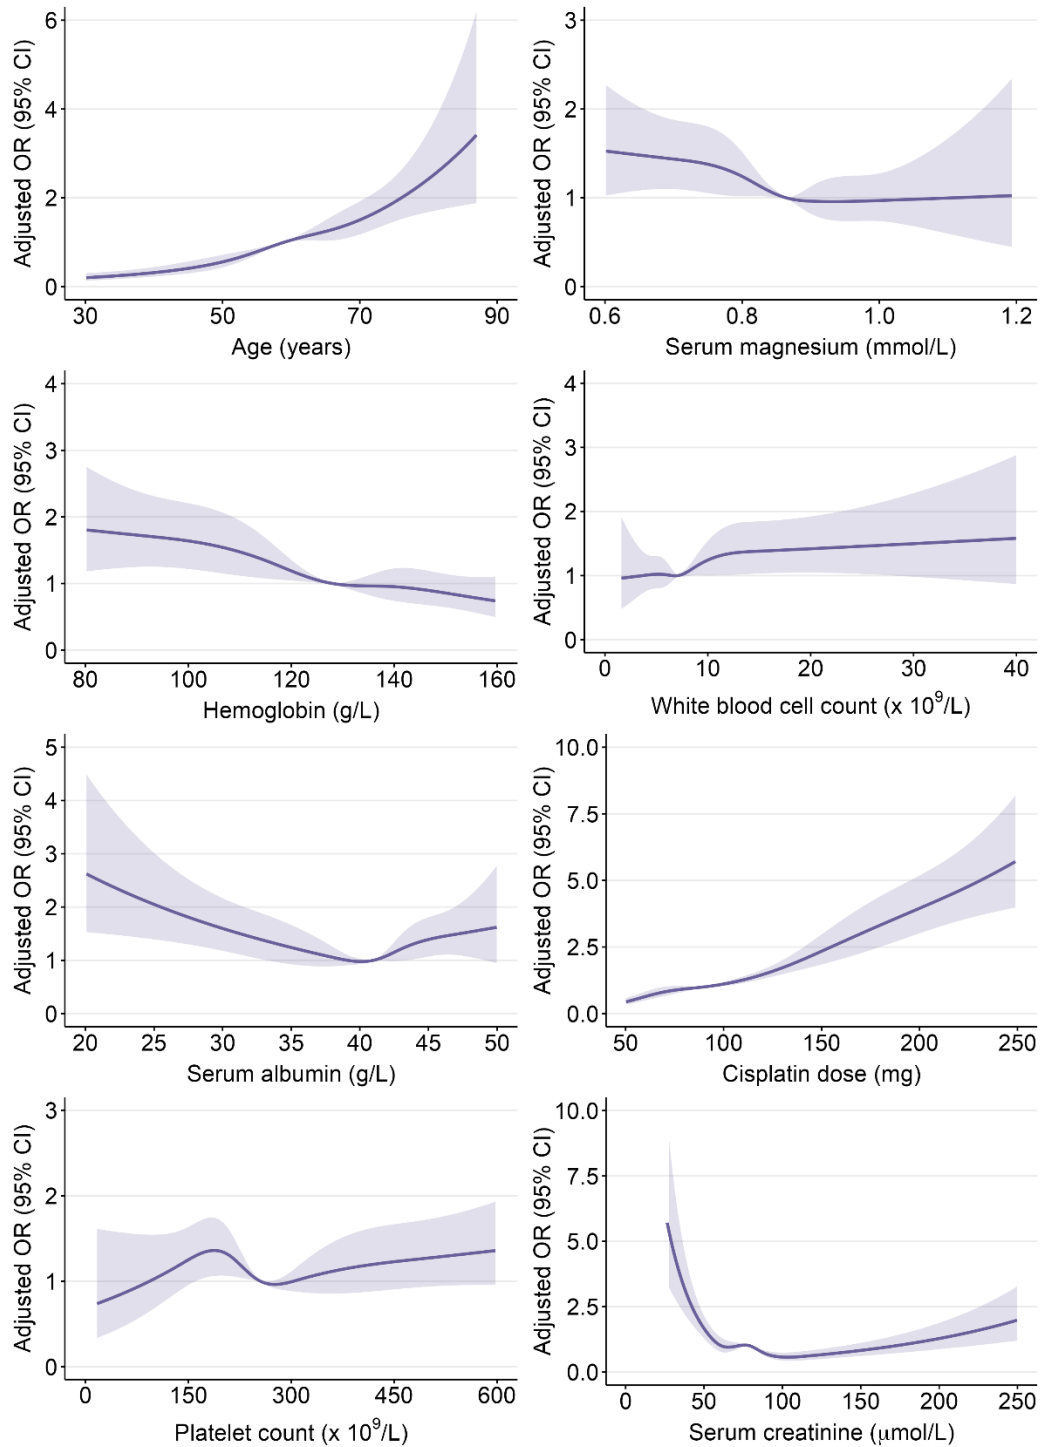

Partial effect plots for restricted cubic splines for continuous variables included in primary model. The odds ratio for each variable was adjusted for the median values of other variables in the model. Abbreviations: CI, confidence interval; OR, odds ratio.

**Figure S5. CP-AKI and Risk Score Characteristics**

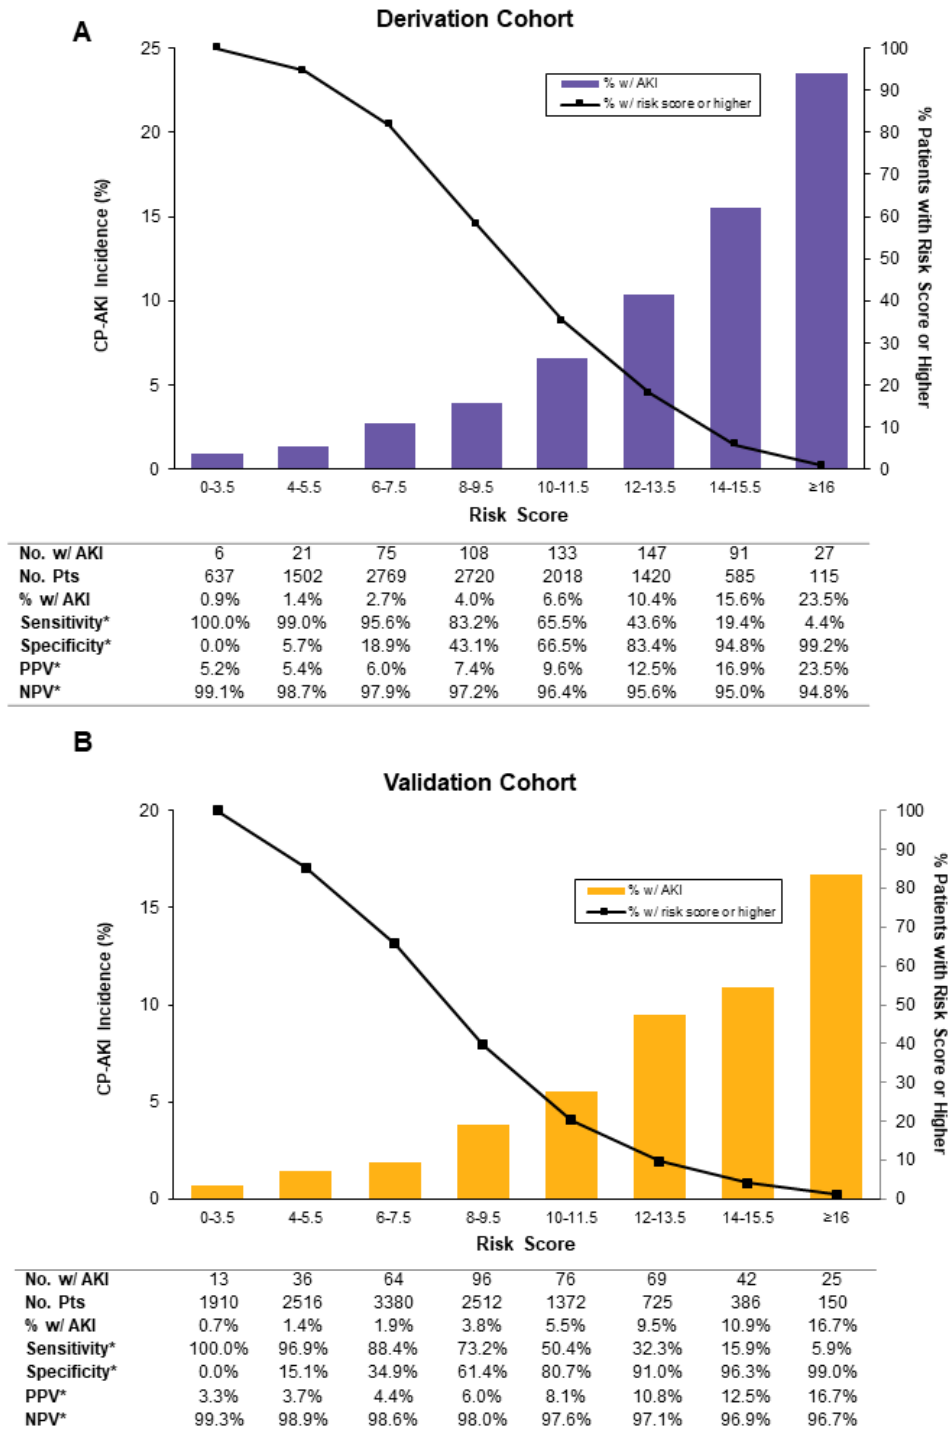

Depicts the percentage of patients with CP-AKI within each risk score category, and the sensitivity/specificity and positive predictive value/negative predictive value for each risk score category, in the DC (Panel A) and VC (Panel B). Bars (left axes) show the proportion with CP-AKI and lines (right axes) show the percentage of patients with the risk score or higher.

Abbreviations: CP-AKI, cisplatin-associated acute kidney injury; NPV, negative predictive value; PPV, positive predictive value.

**Figure S6. Incidence of CP-AKI According to Risk Score in Quartiles in the Derivation and Validation Cohorts**

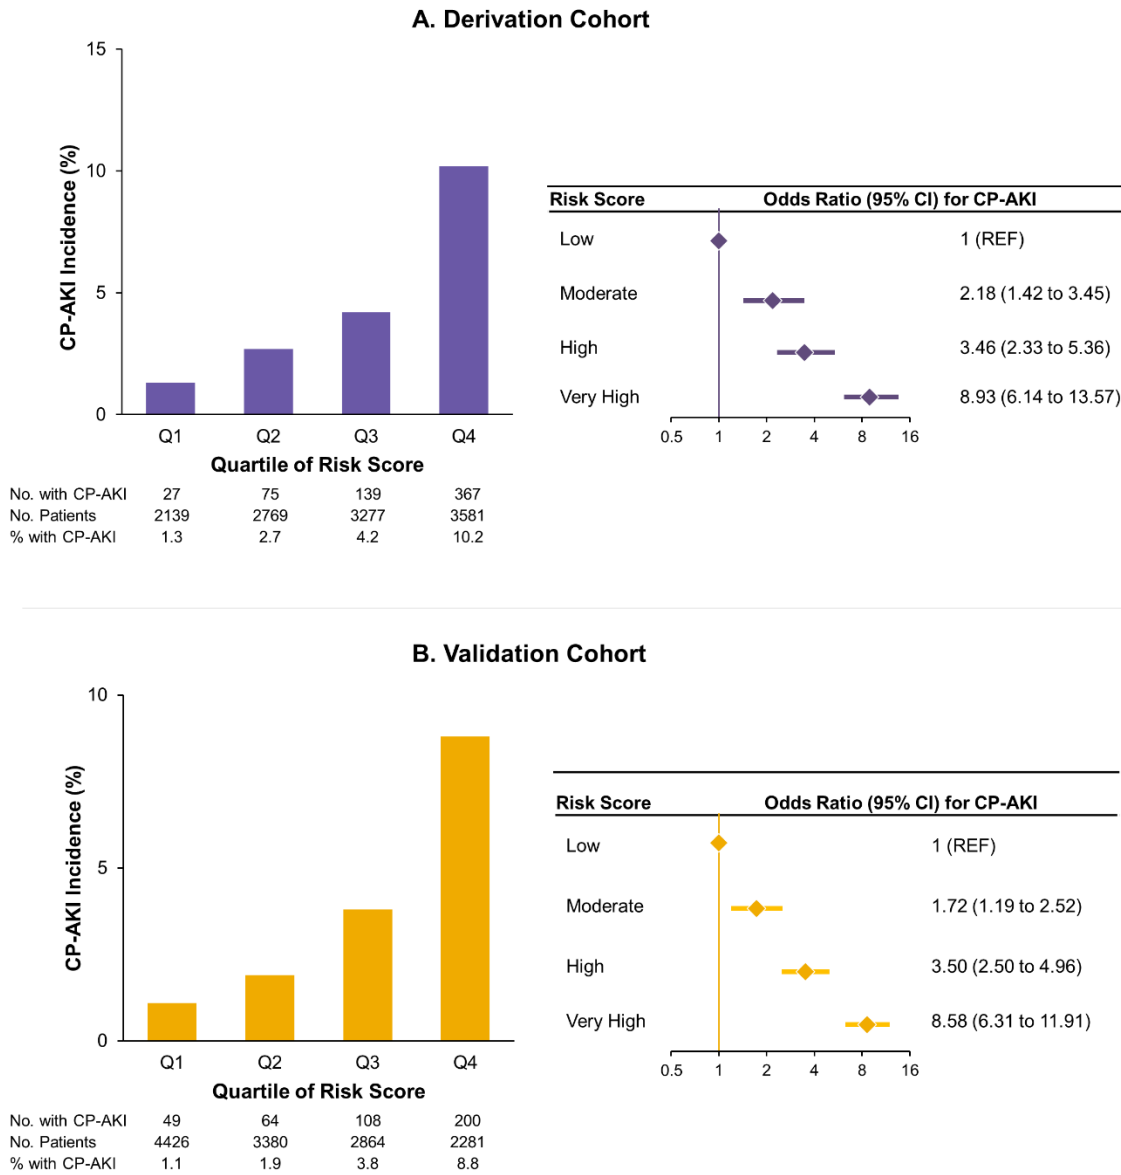

1<sup>st</sup> quartile: 0-5.5 points; 2<sup>nd</sup> quartile: 6-7.5 points; 3<sup>rd</sup> quartile: 8-10 points; 4<sup>th</sup> quartile: ≥10.5 points

Abbreviations: CP-AKI, cisplatin-associated acute kidney injury; DC, derivation cohort; OR, odds ratio; REF, reference group; VC, validation cohort.

Figure S7. Model Calibration in the Validation Cohort

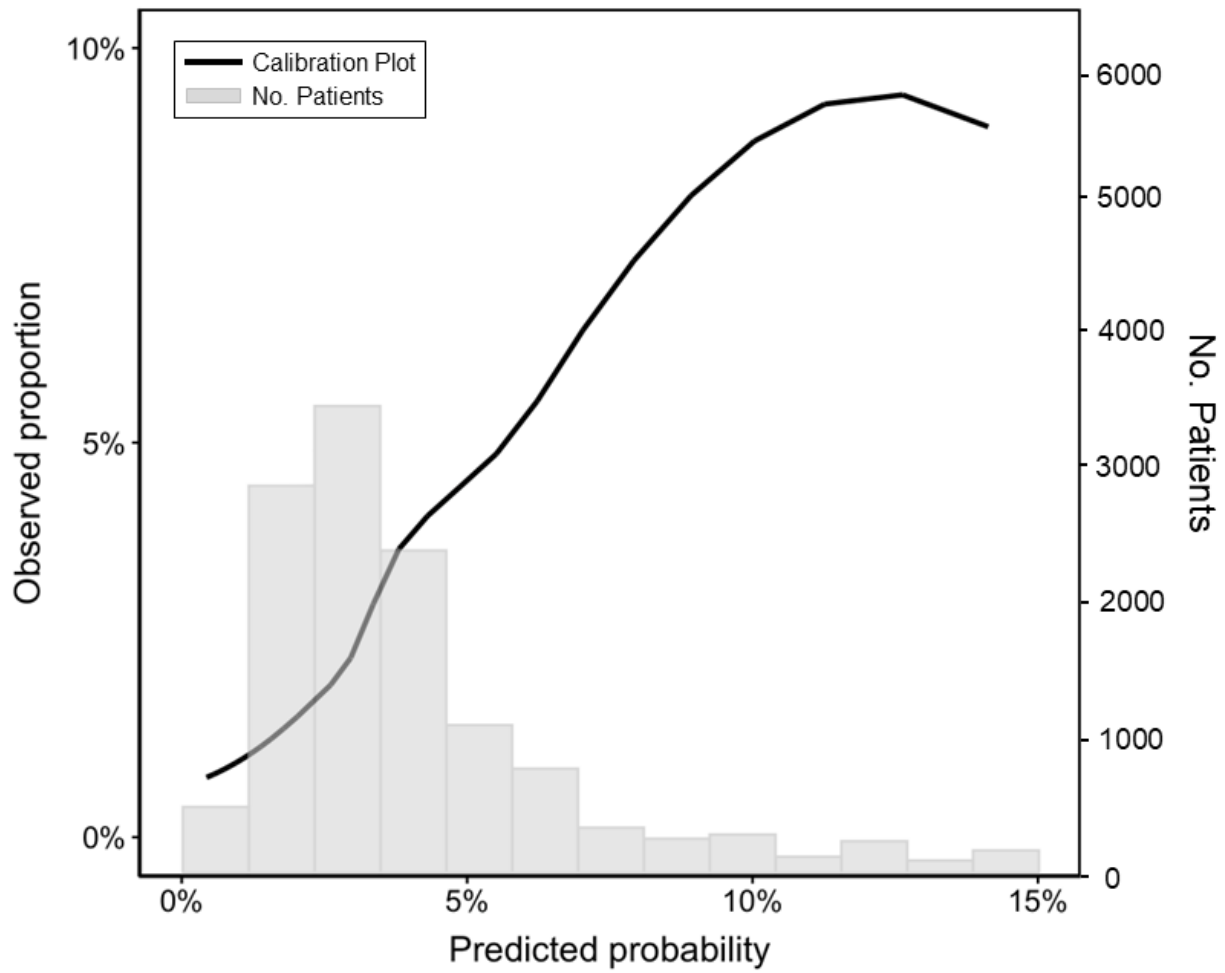

The calibration plot shows the predicted versus observed proportion of CP-AKI. Slope: 0.98; Intercept: -0.15.  
Abbreviations: No, number



Figure S8. Decision Curves

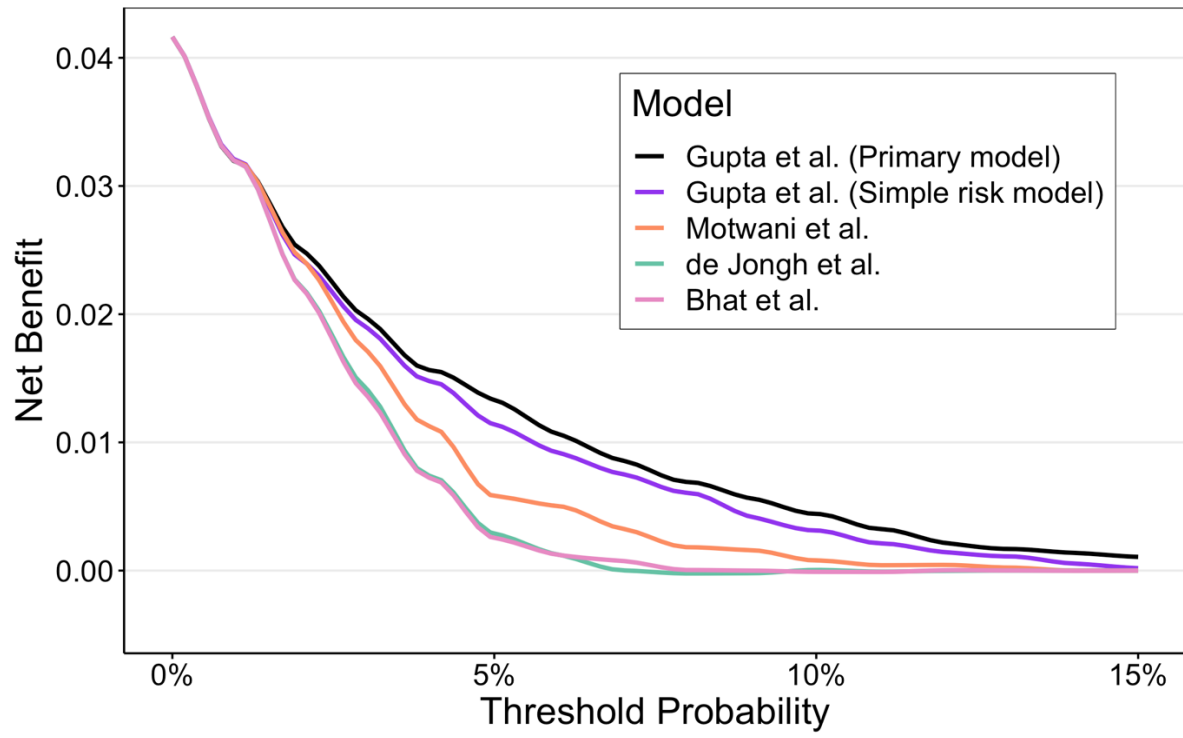

Figure S9. Discrimination of Primary Model in Additional Analyses and Secondary Outcomes

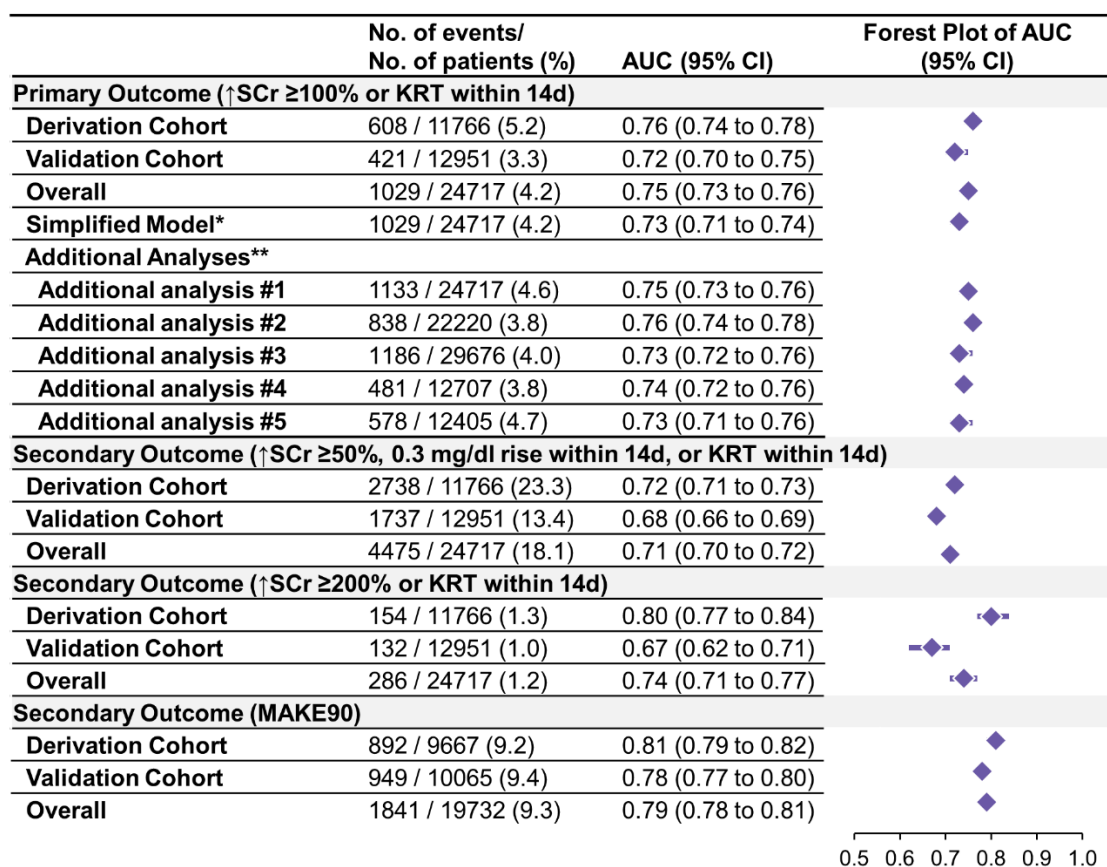

\*Refers to model in which continuous variables were categorized.

\*\*Additional analyses refer to #1: outcome is composite of CP-AKI or death in the first 14 days following cisplatin administration; #2: outcome is CP-AKI in the 10 days following cisplatin administration; #3: outcome is CP-AKI in the 21 days following cisplatin administration; #4: analysis is limited to patients treated with cisplatin in 2016 or later; #5: complete case analysis rather than use of multiple imputation for missing data.

Abbreviations: AUC, area under the curve; CI, confidence interval; d, day; KRT, kidney replacement therapy; MAKE, major adverse kidney event; SCr, serum creatinine.

Figure S10. C-Statistics for Secondary Outcomes

A

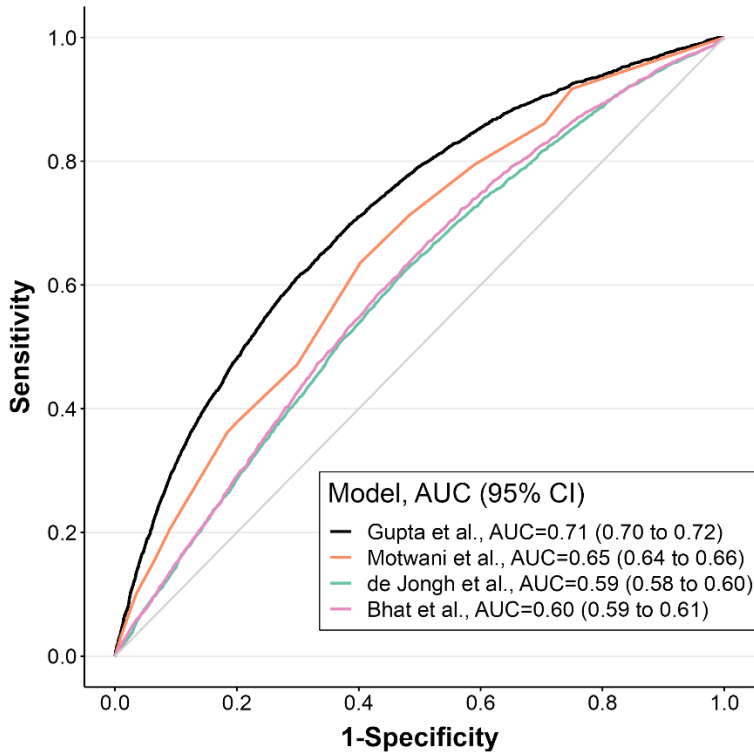

B

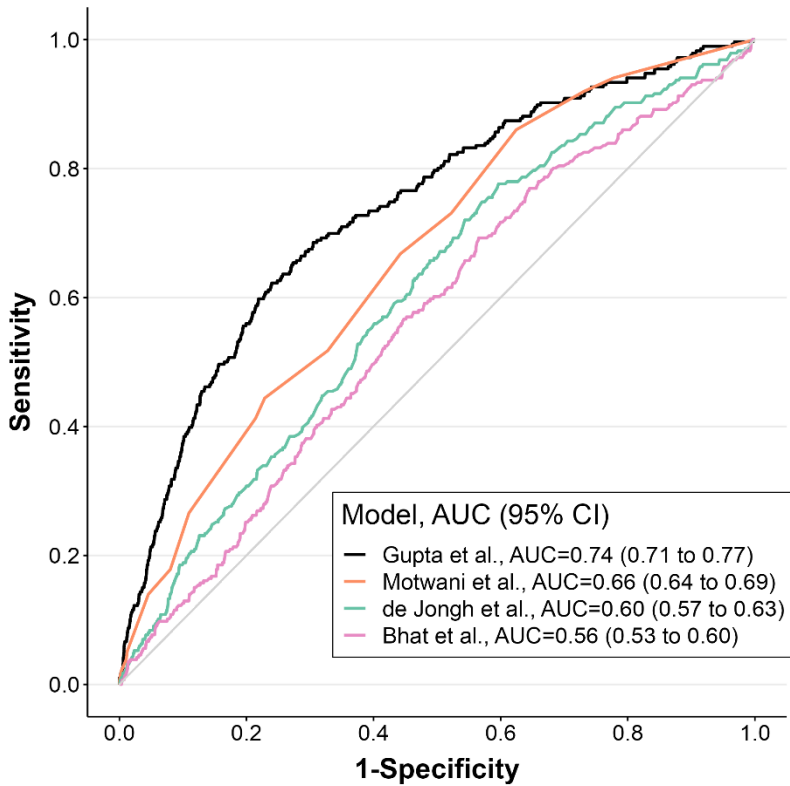

C

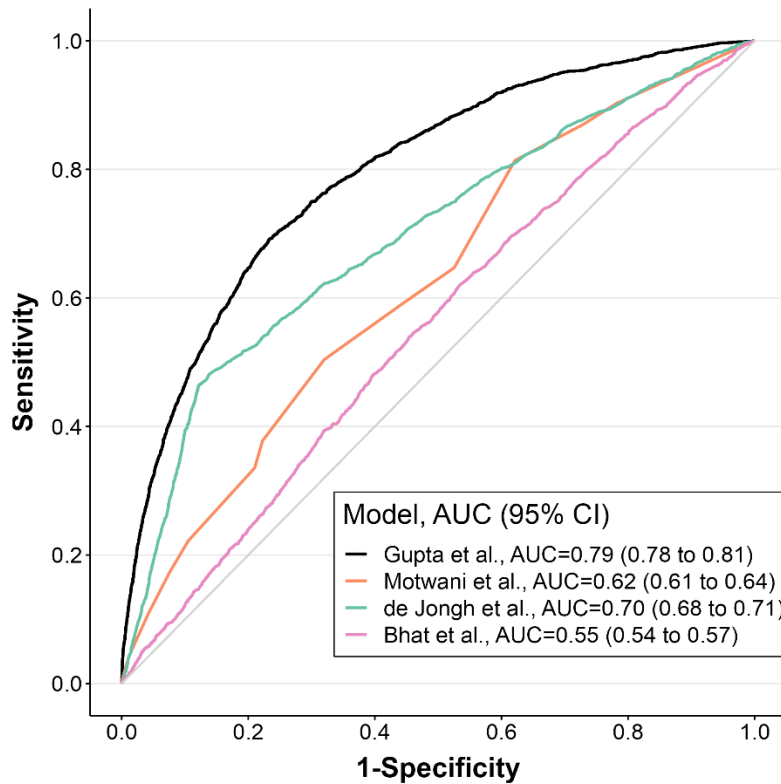

Panel A shows CP-AKI, defined according to modified KDIGO AKI staging as any of the following occurring in the first 14 days following IV cisplatin: absolute increase in SCr of  $\geq 26.5 \mu\text{mol}$  compared to baseline, relative increase in SCr  $\geq 1.5$ -fold compared to baseline, or receipt of KRT. Panel B shows severe CP-AKI, defined as  $\geq 3$ -fold rise in SCr or receipt of KRT within 14 days following the first dose of IV cisplatin. Panel C shows MAKE90, defined as death within 90 days, KRT within 90 days, or persistent kidney dysfunction (increase in SCr  $\geq 100\%$  compared to baseline) at day 90 post-cisplatin.

Abbreviations: AUC, area under the curve; CI confidence interval; KRT, kidney replacement therapy; MAKE, major adverse kidney event; SCr, serum creatinine

**Figure S11. CP-AKI Severity and 1-Year Survival**

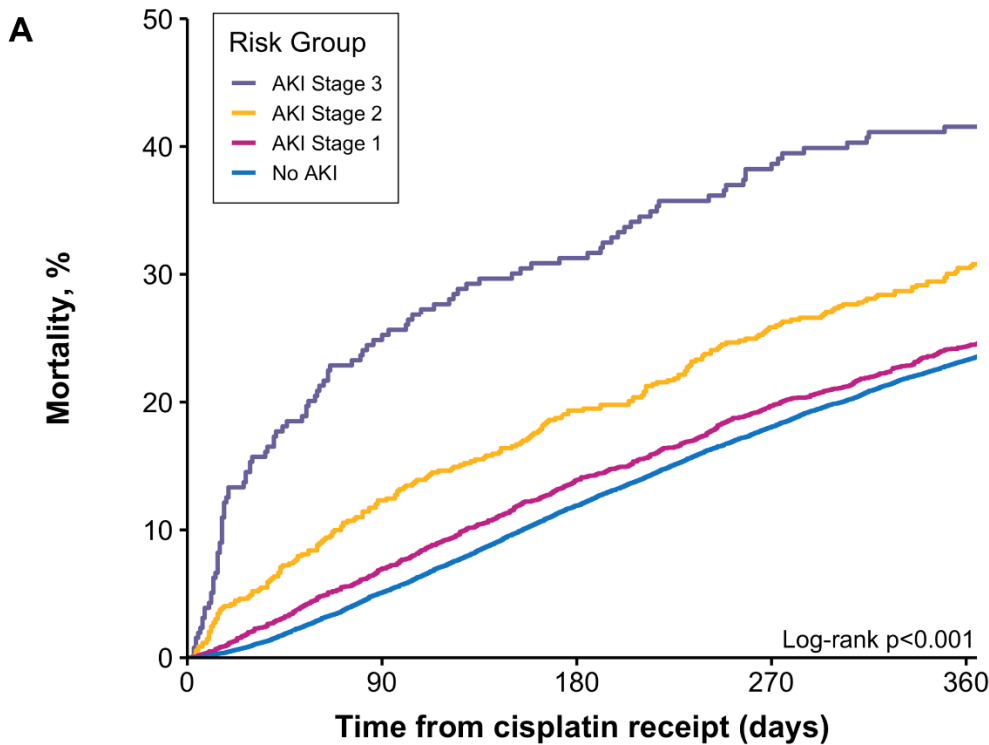

No. at risk

|                    |        |        |        |        |        |
|--------------------|--------|--------|--------|--------|--------|
| <b>AKI Stage 3</b> | 257    | 189    | 171    | 149    | 141    |
| <b>AKI Stage 2</b> | 693    | 602    | 547    | 498    | 461    |
| <b>AKI Stage 1</b> | 3226   | 2967   | 2722   | 2515   | 2354   |
| <b>No AKI</b>      | 18,393 | 17,204 | 15,698 | 14,389 | 13,269 |

**B**

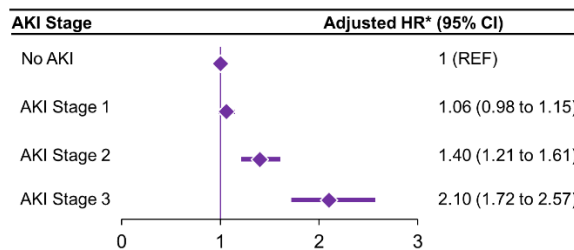

Panel A shows the cumulative incidence of death in the first year following cisplatin administration according to CP-AKI stage. CP-AKI severity was categorized into four groups: no AKI, AKI stage 1 (an increase in SCr  $\geq 26.5 \mu\text{mol/l}$  or a 1.5-1.9-fold rise in SCr), AKI stage 2 (2-2.9-fold rise in SCr) or AKI stage 3 ( $\geq 3$ -fold rise in SCr or KRT), each assessed within 14 days following cisplatin administration. Panel B shows a multivariable Cox model for 1-year survival according to CP-AKI stage ( $n=22,850$ ). The model was adjusted for age, male sex, body mass index, hypertension, diabetes mellitus, chronic obstructive pulmonary disease, smoking, serum creatinine, white blood cell count, hemoglobin, platelet count, serum magnesium, serum albumin, cisplatin dose, and concomitant nephrotoxic chemotherapy (binary variable that included receipt of pemetrexed, cetuximab, ifosfamide, immune checkpoint inhibitors within 30 days prior to cisplatin administration).

Abbreviations: CI, confidence interval; CP-AKI, cisplatin-associated acute kidney injury; HR, hazard ratio; KRT, kidney replacement therapy; SCr, serum creatinine

Figure S12. MAKE365

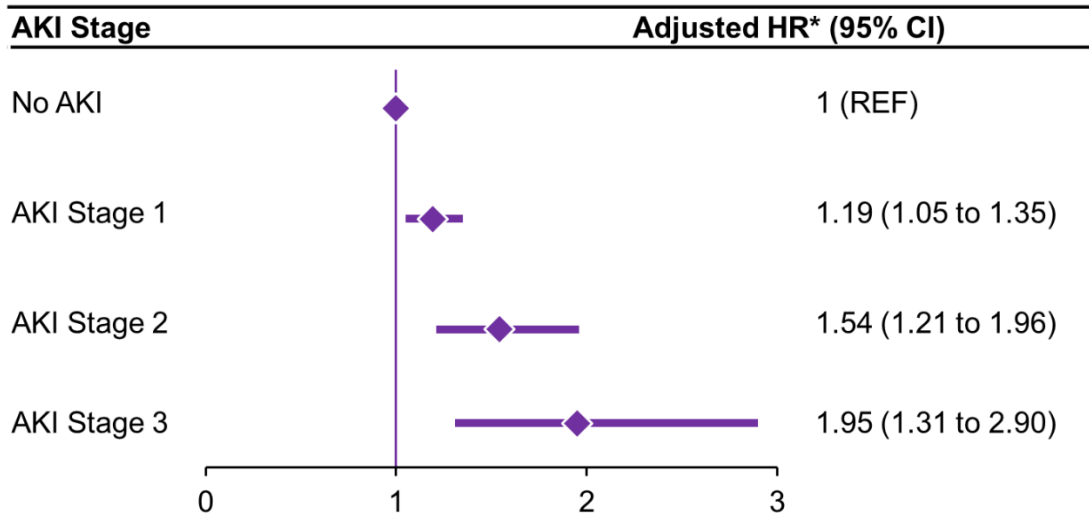

MAKE365 is defined as any death or KRT in the first 365 days or persistent kidney dysfunction (doubling of SCr) at day 365. Models were adjusted for age, sex, body mass index, hypertension, diabetes mellitus, COPD, smoking, baseline SCr, WBC count, hemoglobin, platelet count, serum magnesium, serum albumin, cisplatin dose, and concomitant nephrotoxic chemotherapy (receipt of pemetrexed, cetuximab, ifosfamide, or immune checkpoint inhibitors within 30 days prior to cisplatin administration). Abbreviations: AKI, acute kidney injury; CI, confidence interval; COPD, chronic obstructive pulmonary disease; HR, hazard ratio; KRT, kidney replacement therapy; MAKE, major adverse kidney event; SCr, serum creatinine; WBC, white blood cell count

Figure S13. Expert Recommendations for CP-AKI

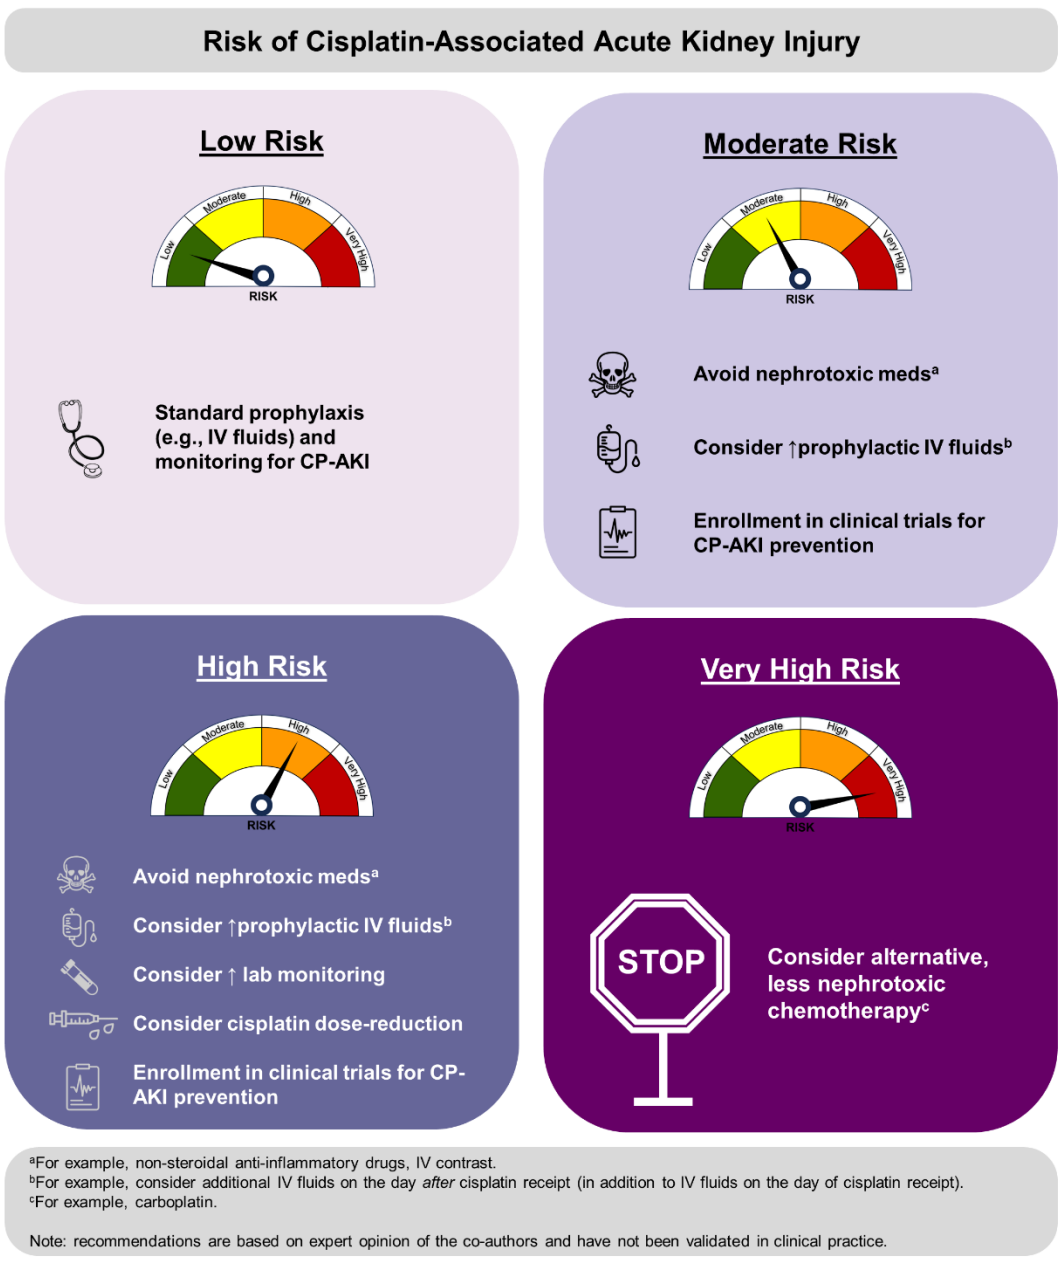

## Supplemental References

1. Riley RD, Ensor J, Snell KIE, Harrell FE, Martin GP, Reitsma JB, et al. Calculating the sample size required for developing a clinical prediction model. *BMJ*. 2020;368.
2. Riley RD, Debray TPA, Collins GS, Archer L, Ensor J, van Smeden M, et al. Minimum sample size for external validation of a clinical prediction model with a binary outcome. *Stat Med*. 2021;40(19).
3. Inker LA, Eneanya ND, Coresh J, Tighiouart H, Wang D, Sang Y, et al. New Creatinine- and Cystatin C–Based Equations to Estimate GFR without Race. *N Engl J Med*. 2021;385(19).
